# Supplementary material for: Long-term warming results in species-specific shifts in seed mass in alpine communities
Source: PeerJ. 2019 Jul 31;7:e7416. doi: 10.7717/peerj.7416 (PMC6679644; doi:10.7717/peerj.7416)
Supplement: Data S1 [file peerj-07-7416-s001.xlsx]

## Sheet: Sheet1
species	site	treatment	plot	seed mass
Delphinium albocoeruleum	LG	CK	1a	0.0549685
Delphinium albocoeruleum	LG	CK	3a	0.0574205
Delphinium albocoeruleum	LG	CK	4a	0.0629766
Delphinium albocoeruleum	LG	CK	5a	0.0628577
Delphinium albocoeruleum	LG	CK	7a	0.0545939
Deschampsia caespitosa	LG	CK	1a	0.0254705
Deschampsia caespitosa	LG	CK	2a	0.0261766
Deschampsia caespitosa	LG	CK	4a	0.0269889
Deschampsia caespitosa	LG	CK	5a	0.0262547
Deschampsia caespitosa	LG	CK	6a	0.0250352
Draba eriopoda	LG	CK	2a	0.00408156
Draba eriopoda	LG	CK	3a	0.00441516
Draba eriopoda	LG	CK	5a	0.00450044
Draba eriopoda	LG	CK	7a	0.0053441
Draba eriopoda	LG	CK	8a	0.00409744
Elymus nutans	LG	CK	1a	0.343129
Elymus nutans	LG	CK	2a	0.330738
Elymus nutans	LG	CK	4a	0.330445
Elymus nutans	LG	CK	6a	0.343987
Elymus nutans	LG	CK	7a	0.330256
Euphrasia pectinata	LG	CK	3a	0.0106543
Euphrasia pectinata	LG	CK	4a	0.010143
Euphrasia pectinata	LG	CK	5a	0.0104952
Euphrasia pectinata	LG	CK	6a	0.0113187
Euphrasia pectinata	LG	CK	7a	0.00966333
Festuca rubra	LG	CK	1a	0.0655034
Festuca rubra	LG	CK	2a	0.0625448
Festuca rubra	LG	CK	4a	0.0614706
Festuca rubra	LG	CK	6a	0.0653843
Festuca rubra	LG	CK	7a	0.0620467
Gentiana aristata	LG	CK	1a	0.0075926
Gentiana aristata	LG	CK	2a	0.0077631
Gentiana aristata	LG	CK	3a	0.00667205
Gentiana aristata	LG	CK	5a	0.00723043
Gentiana aristata	LG	CK	6a	0.00722623
Gentiana straminea	LG	CK	2a	0.0273
Gentiana straminea	LG	CK	3a	0.02786
Gentiana straminea	LG	CK	5a	0.0270507
Gentiana straminea	LG	CK	6a	0.0285145
Gentiana straminea	LG	CK	8a	0.0277878
Gentianopsis barbata	LG	CK	1a	0.00924972
Gentianopsis barbata	LG	CK	3a	0.00824043
Gentianopsis barbata	LG	CK	4a	0.00803895
Gentianopsis barbata	LG	CK	6a	0.00911962
Gentianopsis barbata	LG	CK	7a	0.00824991
Koeleria cristata	LG	CK	1a	0.0207561
Koeleria cristata	LG	CK	2a	0.0217335
Koeleria cristata	LG	CK	3a	0.0221036
Koeleria cristata	LG	CK	5a	0.0214141
Koeleria cristata	LG	CK	6a	0.020795
Lomatogonium carinthiacum	LG	CK	3a	0.0167453
Lomatogonium carinthiacum	LG	CK	4a	0.0160048
Lomatogonium carinthiacum	LG	CK	5a	0.0157752
Lomatogonium carinthiacum	LG	CK	6a	0.0173716
Lomatogonium carinthiacum	LG	CK	8a	0.0149546
Morina chinensis	LG	CK	1a	0.403653
Morina chinensis	LG	CK	2a	0.401632
Morina chinensis	LG	CK	5a	0.406797
Morina chinensis	LG	CK	6a	0.411829
Morina chinensis	LG	CK	7a	0.402422
Pedicularis kansuensis	LG	CK	1a	0.0460743
Pedicularis kansuensis	LG	CK	3a	0.0465535
Pedicularis kansuensis	LG	CK	5a	0.0467296
Pedicularis kansuensis	LG	CK	6a	0.0468712
Pedicularis kansuensis	LG	CK	8a	0.0468667
Potentilla nivea	LG	CK	3a	0.0306032
Potentilla nivea	LG	CK	5a	0.0307211
Potentilla nivea	LG	CK	6a	0.0311629
Potentilla nivea	LG	CK	7a	0.0320005
Potentilla nivea	LG	CK	8a	0.0313902
Ptilagrostis dichotoma	LG	CK	1a	0.0943976
Ptilagrostis dichotoma	LG	CK	3a	0.0920183
Ptilagrostis dichotoma	LG	CK	5a	0.093693
Ptilagrostis dichotoma	LG	CK	6a	0.0937208
Ptilagrostis dichotoma	LG	CK	7a	0.091509
Ranunculus tanguticus	LG	CK	1a	0.0272744
Ranunculus tanguticus	LG	CK	3a	0.025568
Ranunculus tanguticus	LG	CK	4a	0.0235803
Ranunculus tanguticus	LG	CK	6a	0.024295
Ranunculus tanguticus	LG	CK	8a	0.0240602
Stipa aliena	LG	CK	1a	0.373955
Stipa aliena	LG	CK	3a	0.379408
Stipa aliena	LG	CK	4a	0.37693
Stipa aliena	LG	CK	7a	0.379789
Stipa aliena	LG	CK	8a	0.374769
Taraxacum mongolicum	LG	CK	1a	0.0778901
Taraxacum mongolicum	LG	CK	3a	0.0812758
Taraxacum mongolicum	LG	CK	4a	0.0787093
Taraxacum mongolicum	LG	CK	5a	0.0813778
Taraxacum mongolicum	LG	CK	8a	0.0780456
Veronica eriogyne	LG	CK	3a	0.00462292
Veronica eriogyne	LG	CK	4a	0.00455061
Veronica eriogyne	LG	CK	5a	0.0051415
Veronica eriogyne	LG	CK	6a	0.00554334
Veronica eriogyne	LG	CK	7a	0.00396727
Delphinium albocoeruleum	LG	OTC	1b	0.0617288
Delphinium albocoeruleum	LG	OTC	3b	0.067351
Delphinium albocoeruleum	LG	OTC	4b	0.0666866
Delphinium albocoeruleum	LG	OTC	7b	0.0677581
Delphinium albocoeruleum	LG	OTC	8b	0.0617959
Deschampsia caespitosa	LG	OTC	3b	0.0247371
Deschampsia caespitosa	LG	OTC	4b	0.020922
Deschampsia caespitosa	LG	OTC	6b	0.0208974
Deschampsia caespitosa	LG	OTC	7b	0.0253085
Deschampsia caespitosa	LG	OTC	8b	0.021067
Draba eriopoda	LG	OTC	1b	0.00341939
Draba eriopoda	LG	OTC	2b	0.00352019
Draba eriopoda	LG	OTC	4b	0.00300015
Draba eriopoda	LG	OTC	6b	0.00316135
Draba eriopoda	LG	OTC	7b	0.002572
Elymus nutans	LG	OTC	2b	0.303517
Elymus nutans	LG	OTC	3b	0.309523
Elymus nutans	LG	OTC	5b	0.311562
Elymus nutans	LG	OTC	7b	0.311789
Elymus nutans	LG	OTC	8b	0.303874
Euphrasia pectinata	LG	OTC	2b	0.0109036
Euphrasia pectinata	LG	OTC	3b	0.0116506
Euphrasia pectinata	LG	OTC	5b	0.0113707
Euphrasia pectinata	LG	OTC	6b	0.012516
Euphrasia pectinata	LG	OTC	8b	0.0107645
Festuca rubra	LG	OTC	2b	0.0647982
Festuca rubra	LG	OTC	4b	0.0655639
Festuca rubra	LG	OTC	5b	0.0651861
Festuca rubra	LG	OTC	6b	0.0655693
Festuca rubra	LG	OTC	7b	0.0648396
Gentiana aristata	LG	OTC	1b	0.00960568
Gentiana aristata	LG	OTC	2b	0.0104204
Gentiana aristata	LG	OTC	3b	0.0105426
Gentiana aristata	LG	OTC	7b	0.0114284
Gentiana aristata	LG	OTC	8b	0.00997097
Gentiana straminea	LG	OTC	3b	0.0272744
Gentiana straminea	LG	OTC	4b	0.0276559
Gentiana straminea	LG	OTC	5b	0.0274338
Gentiana straminea	LG	OTC	7b	0.0282221
Gentiana straminea	LG	OTC	8b	0.0273705
Gentianopsis barbata	LG	OTC	1b	0.00862893
Gentianopsis barbata	LG	OTC	2b	0.0101662
Gentianopsis barbata	LG	OTC	4b	0.00956406
Gentianopsis barbata	LG	OTC	6b	0.010961
Gentianopsis barbata	LG	OTC	8b	0.00856142
Koeleria cristata	LG	OTC	1b	0.0192346
Koeleria cristata	LG	OTC	2b	0.0212841
Koeleria cristata	LG	OTC	5b	0.0187936
Koeleria cristata	LG	OTC	7b	0.0213914
Koeleria cristata	LG	OTC	8b	0.0192888
Lomatogonium carinthiacum	LG	OTC	1b	0.0171684
Lomatogonium carinthiacum	LG	OTC	2b	0.0183809
Lomatogonium carinthiacum	LG	OTC	3b	0.0174396
Lomatogonium carinthiacum	LG	OTC	4b	0.0182057
Lomatogonium carinthiacum	LG	OTC	7b	0.0167652
Morina chinensis	LG	OTC	2b	0.405077
Morina chinensis	LG	OTC	4b	0.403049
Morina chinensis	LG	OTC	6b	0.402365
Morina chinensis	LG	OTC	7b	0.402824
Morina chinensis	LG	OTC	8b	0.402754
Pedicularis kansuensis	LG	OTC	1b	0.0341412
Pedicularis kansuensis	LG	OTC	3b	0.0341462
Pedicularis kansuensis	LG	OTC	5b	0.0351393
Pedicularis kansuensis	LG	OTC	6b	0.0353195
Pedicularis kansuensis	LG	OTC	7b	0.0347965
Potentilla nivea	LG	OTC	2b	0.0218061
Potentilla nivea	LG	OTC	3b	0.0219152
Potentilla nivea	LG	OTC	5b	0.0210378
Potentilla nivea	LG	OTC	7b	0.0219839
Potentilla nivea	LG	OTC	8b	0.0206965
Ptilagrostis dichotoma	LG	OTC	1b	0.0907997
Ptilagrostis dichotoma	LG	OTC	2b	0.0957669
Ptilagrostis dichotoma	LG	OTC	4b	0.100077
Ptilagrostis dichotoma	LG	OTC	7b	0.0995619
Ptilagrostis dichotoma	LG	OTC	8b	0.0911108
Ranunculus tanguticus	LG	OTC	1b	0.0240678
Ranunculus tanguticus	LG	OTC	3b	0.0241948
Ranunculus tanguticus	LG	OTC	4b	0.0215316
Ranunculus tanguticus	LG	OTC	5b	0.0245262
Ranunculus tanguticus	LG	OTC	6b	0.0207456
Stipa aliena	LG	OTC	3b	0.382568
Stipa aliena	LG	OTC	4b	0.396584
Stipa aliena	LG	OTC	6b	0.392878
Stipa aliena	LG	OTC	7b	0.397431
Stipa aliena	LG	OTC	8b	0.381767
Taraxacum mongolicum	LG	OTC	1b	0.0740181
Taraxacum mongolicum	LG	OTC	2b	0.0726231
Taraxacum mongolicum	LG	OTC	4b	0.0714233
Taraxacum mongolicum	LG	OTC	6b	0.0748557
Taraxacum mongolicum	LG	OTC	7b	0.0705342
Veronica eriogyne	LG	OTC	1b	0.00396335
Veronica eriogyne	LG	OTC	3b	0.00485737
Veronica eriogyne	LG	OTC	4b	0.00550688
Veronica eriogyne	LG	OTC	5b	0.00562393
Veronica eriogyne	LG	OTC	7b	0.00440446
Ajania tenuifolia	HG	CK	1c	0.019425
Ajania tenuifolia	HG	CK	2c	0.0178137
Ajania tenuifolia	HG	CK	4c	0.0182012
Ajania tenuifolia	HG	CK	5c	0.0199334
Ajania tenuifolia	HG	CK	7c	0.0179913
Anaphalis lactea	HG	CK	1c	0.0148855
Anaphalis lactea	HG	CK	2c	0.0169814
Anaphalis lactea	HG	CK	3c	0.0167104
Anaphalis lactea	HG	CK	4c	0.0167421
Anaphalis lactea	HG	CK	5c	0.0153278
Aster flaccidus	HG	CK	1c	0.0735872
Aster flaccidus	HG	CK	2c	0.0752225
Aster flaccidus	HG	CK	3c	0.0740286
Aster flaccidus	HG	CK	5c	0.0746688
Aster flaccidus	HG	CK	6c	0.0733014
Campanula aristata	HG	CK	2c	0.00355095
Campanula aristata	HG	CK	3c	0.00267467
Campanula aristata	HG	CK	4c	0.00337889
Campanula aristata	HG	CK	6c	0.00309279
Campanula aristata	HG	CK	7c	0.00243696
Deschampsia caespitosa	HG	CK	1c	0.031982
Deschampsia caespitosa	HG	CK	2c	0.0325166
Deschampsia caespitosa	HG	CK	4c	0.0354435
Deschampsia caespitosa	HG	CK	6c	0.0361203
Deschampsia caespitosa	HG	CK	7c	0.0318743
Elymus nutans	HG	CK	3c	0.323481
Elymus nutans	HG	CK	4c	0.319502
Elymus nutans	HG	CK	5c	0.321838
Elymus nutans	HG	CK	6c	0.322583
Elymus nutans	HG	CK	7c	0.319767
Euphrasia pectinata	HG	CK	1c	0.0100081
Euphrasia pectinata	HG	CK	3c	0.010446
Euphrasia pectinata	HG	CK	5c	0.0111321
Euphrasia pectinata	HG	CK	6c	0.0116876
Euphrasia pectinata	HG	CK	7c	0.00961999
Festuca rubra	HG	CK	2c	0.0645919
Festuca rubra	HG	CK	3c	0.0627286
Festuca rubra	HG	CK	4c	0.0624856
Festuca rubra	HG	CK	5c	0.0630991
Festuca rubra	HG	CK	6c	0.062362
Gentiana aristata	HG	CK	1c	0.00784761
Gentiana aristata	HG	CK	3c	0.0119734
Gentiana aristata	HG	CK	4c	0.00904484
Gentiana aristata	HG	CK	6c	0.0117678
Gentiana aristata	HG	CK	7c	0.0087465
Gentiana straminea	HG	CK	1c	0.0250872
Gentiana straminea	HG	CK	3c	0.024843
Gentiana straminea	HG	CK	4c	0.0271728
Gentiana straminea	HG	CK	6c	0.0270975
Gentiana straminea	HG	CK	7c	0.0247668
Gentianopsis barbata	HG	CK	2c	0.0073003
Gentianopsis barbata	HG	CK	4c	0.0079458
Gentianopsis barbata	HG	CK	5c	0.00717795
Gentianopsis barbata	HG	CK	6c	0.00845154
Gentianopsis barbata	HG	CK	7c	0.00668477
Koeleria cristata	HG	CK	1c	0.0224687
Koeleria cristata	HG	CK	4c	0.024259
Koeleria cristata	HG	CK	5c	0.0239347
Koeleria cristata	HG	CK	6c	0.0241919
Koeleria cristata	HG	CK	7c	0.0227365
Lomatogonium carinthiacum	HG	CK	1c	0.0202222
Lomatogonium carinthiacum	HG	CK	2c	0.0209586
Lomatogonium carinthiacum	HG	CK	5c	0.0206522
Lomatogonium carinthiacum	HG	CK	6c	0.0202507
Lomatogonium carinthiacum	HG	CK	7c	0.0195005
Morina chinensis	HG	CK	3c	0.360777
Morina chinensis	HG	CK	4c	0.368717
Morina chinensis	HG	CK	5c	0.364584
Morina chinensis	HG	CK	6c	0.368666
Morina chinensis	HG	CK	7c	0.360282
Notopterygium forbesii	HG	CK	2c	0.191445
Notopterygium forbesii	HG	CK	3c	0.195086
Notopterygium forbesii	HG	CK	5c	0.201884
Notopterygium forbesii	HG	CK	6c	0.201867
Notopterygium forbesii	HG	CK	7c	0.191608
Pedicularis kansuensis	HG	CK	2c	0.0446157
Pedicularis kansuensis	HG	CK	3c	0.043271
Pedicularis kansuensis	HG	CK	4c	0.0420693
Pedicularis kansuensis	HG	CK	5c	0.0452317
Pedicularis kansuensis	HG	CK	6c	0.0426156
Poa crymophila	HG	CK	1c	0.02087
Poa crymophila	HG	CK	2c	0.021122
Poa crymophila	HG	CK	4c	0.0205798
Poa crymophila	HG	CK	5c	0.0198788
Poa crymophila	HG	CK	6c	0.0203813
Ptilagrostis dichotoma	HG	CK	1c	0.0922775
Ptilagrostis dichotoma	HG	CK	2c	0.0978543
Ptilagrostis dichotoma	HG	CK	4c	0.0952845
Ptilagrostis dichotoma	HG	CK	6c	0.0971581
Ptilagrostis dichotoma	HG	CK	7c	0.0931145
Saussurea nigrescens	HG	CK	1c	0.140396
Saussurea nigrescens	HG	CK	2c	0.142167
Saussurea nigrescens	HG	CK	3c	0.154672
Saussurea nigrescens	HG	CK	4c	0.155413
Saussurea nigrescens	HG	CK	7c	0.149553
Stipa aliena	HG	CK	2c	0.412098
Stipa aliena	HG	CK	3c	0.407041
Stipa aliena	HG	CK	4c	0.405416
Stipa aliena	HG	CK	5c	0.412649
Stipa aliena	HG	CK	6c	0.406264
Ajania tenuifolia	HG	OTC	1d	0.0173655
Ajania tenuifolia	HG	OTC	2d	0.0185136
Ajania tenuifolia	HG	OTC	4d	0.0201886
Ajania tenuifolia	HG	OTC	5d	0.0197245
Ajania tenuifolia	HG	OTC	6d	0.0182147
Anaphalis lactea	HG	OTC	1d	0.0168487
Anaphalis lactea	HG	OTC	2d	0.0177213
Anaphalis lactea	HG	OTC	5d	0.0166618
Anaphalis lactea	HG	OTC	6d	0.0183784
Anaphalis lactea	HG	OTC	7d	0.0161652
Aster flaccidus	HG	OTC	2d	0.0717699
Aster flaccidus	HG	OTC	3d	0.0667916
Aster flaccidus	HG	OTC	4d	0.0661562
Aster flaccidus	HG	OTC	5d	0.0700908
Aster flaccidus	HG	OTC	6d	0.0657127
Campanula aristata	HG	OTC	2d	0.00321248
Campanula aristata	HG	OTC	3d	0.00273537
Campanula aristata	HG	OTC	4d	0.00249239
Campanula aristata	HG	OTC	5d	0.00387377
Campanula aristata	HG	OTC	7d	0.00260105
Deschampsia caespitosa	HG	OTC	1d	0.0295539
Deschampsia caespitosa	HG	OTC	3d	0.0330547
Deschampsia caespitosa	HG	OTC	4d	0.0303364
Deschampsia caespitosa	HG	OTC	5d	0.0329678
Deschampsia caespitosa	HG	OTC	7d	0.0295698
Elymus nutans	HG	OTC	3d	0.302822
Elymus nutans	HG	OTC	4d	0.311171
Elymus nutans	HG	OTC	5d	0.307993
Elymus nutans	HG	OTC	6d	0.310999
Elymus nutans	HG	OTC	7d	0.302277
Euphrasia pectinata	HG	OTC	1d	0.0130728
Euphrasia pectinata	HG	OTC	2d	0.0127256
Euphrasia pectinata	HG	OTC	4d	0.0125036
Euphrasia pectinata	HG	OTC	6d	0.0129833
Euphrasia pectinata	HG	OTC	7d	0.0128116
Festuca rubra	HG	OTC	1d	0.046053
Festuca rubra	HG	OTC	2d	0.0424754
Festuca rubra	HG	OTC	5d	0.0462164
Festuca rubra	HG	OTC	6d	0.0454089
Festuca rubra	HG	OTC	7d	0.0416712
Gentiana aristata	HG	OTC	1d	0.0111951
Gentiana aristata	HG	OTC	3d	0.0118918
Gentiana aristata	HG	OTC	4d	0.012889
Gentiana aristata	HG	OTC	6d	0.0130323
Gentiana aristata	HG	OTC	7d	0.0111113
Gentiana straminea	HG	OTC	1d	0.0256007
Gentiana straminea	HG	OTC	3d	0.0243828
Gentiana straminea	HG	OTC	5d	0.0246439
Gentiana straminea	HG	OTC	6d	0.0248123
Gentiana straminea	HG	OTC	7d	0.0237666
Gentianopsis barbata	HG	OTC	1d	0.00949371
Gentianopsis barbata	HG	OTC	2d	0.00934587
Gentianopsis barbata	HG	OTC	3d	0.0094646
Gentianopsis barbata	HG	OTC	5d	0.00972542
Gentianopsis barbata	HG	OTC	7d	0.00980969
Koeleria cristata	HG	OTC	1d	0.0123394
Koeleria cristata	HG	OTC	2d	0.0154949
Koeleria cristata	HG	OTC	3d	0.0166656
Koeleria cristata	HG	OTC	5d	0.0163695
Koeleria cristata	HG	OTC	7d	0.0128835
Lomatogonium carinthiacum	HG	OTC	1d	0.0221581
Lomatogonium carinthiacum	HG	OTC	3d	0.0221015
Lomatogonium carinthiacum	HG	OTC	4d	0.0196325
Lomatogonium carinthiacum	HG	OTC	5d	0.0222573
Lomatogonium carinthiacum	HG	OTC	7d	0.0193894
Morina chinensis	HG	OTC	1d	0.398742
Morina chinensis	HG	OTC	3d	0.375064
Morina chinensis	HG	OTC	5d	0.377038
Morina chinensis	HG	OTC	6d	0.39829
Morina chinensis	HG	OTC	7d	0.375793
Notopterygium forbesii	HG	OTC	1d	0.186528
Notopterygium forbesii	HG	OTC	2d	0.185864
Notopterygium forbesii	HG	OTC	3d	0.186863
Notopterygium forbesii	HG	OTC	5d	0.18748
Notopterygium forbesii	HG	OTC	6d	0.186136
Pedicularis kansuensis	HG	OTC	1d	0.0691711
Pedicularis kansuensis	HG	OTC	2d	0.0661113
Pedicularis kansuensis	HG	OTC	3d	0.0626157
Pedicularis kansuensis	HG	OTC	6d	0.0689938
Pedicularis kansuensis	HG	OTC	7d	0.0618219
Poa crymophila	HG	OTC	1d	0.0182048
Poa crymophila	HG	OTC	2d	0.0202676
Poa crymophila	HG	OTC	3d	0.0198438
Poa crymophila	HG	OTC	5d	0.0210163
Poa crymophila	HG	OTC	7d	0.0195311
Ptilagrostis dichotoma	HG	OTC	2d	0.103251
Ptilagrostis dichotoma	HG	OTC	3d	0.109542
Ptilagrostis dichotoma	HG	OTC	4d	0.106106
Ptilagrostis dichotoma	HG	OTC	6d	0.109182
Ptilagrostis dichotoma	HG	OTC	7d	0.10277
Saussurea nigrescens	HG	OTC	1d	0.16343
Saussurea nigrescens	HG	OTC	2d	0.162104
Saussurea nigrescens	HG	OTC	3d	0.163008
Saussurea nigrescens	HG	OTC	5d	0.162133
Saussurea nigrescens	HG	OTC	7d	0.1615
Stipa aliena	HG	OTC	1d	0.399082
Stipa aliena	HG	OTC	3d	0.393353
Stipa aliena	HG	OTC	4d	0.400181
Stipa aliena	HG	OTC	5d	0.399373
Stipa aliena	HG	OTC	7d	0.393751
